# Supplementary material for: Analysis of Skin Pigmentation and Genetic Ancestry in Three Subpopulations from Pakistan: Punjabi, Pashtun, and Baloch
Source: MDPI journal article supplement (doi:10.3390/genes12050733), 2021-05-13
Supplement: s1 [file s1]

## SUPPLEMENTARY MATERIAL

### **Analysis of skin pigmentation and genetic ancestry in three subpopulations from Pakistan: Punjabi, Pashtun, and Baloch**

Muhammad Adnan Shan<sup># a,b</sup>, Olivia Strunge Meyer<sup># a</sup>, Mie Refn<sup>a</sup>, Niels Morling<sup>a</sup>, Jeppe Dyrberg Andersen<sup>\* a</sup>, Claus Børsting<sup>a</sup>

<sup>a</sup> Section of Forensic Genetics, Department of Forensic Medicine, Faculty of Health and Medical Sciences, University of Copenhagen, 2100 Copenhagen, Denmark

<sup>b</sup> Centre for Applied Molecular Biology (CAMB), University of the Punjab, 54590 Lahore, Pakistan

<sup>#</sup>These authors contributed equally.

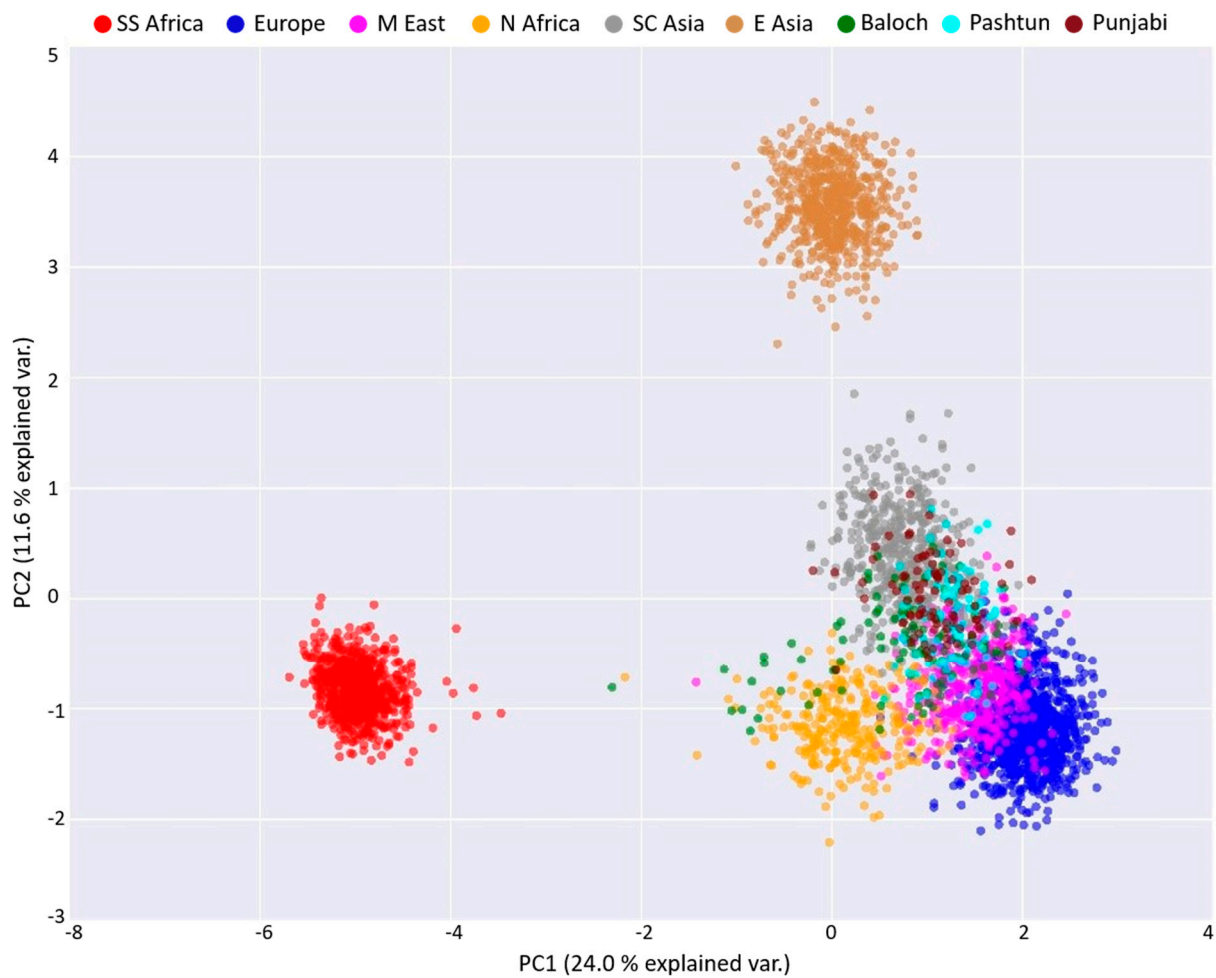

Figure S1: PCA plot of the studied populations and selected reference populations. Each coloured symbol represents an individual according to the population membership. Abbreviations used: SS Africa: Sub-Saharan Africa, M East: Middle East, N Africa: North Africa, SC Asia: South-Central Asia, E Asia: East Asia.

Table S1: Reference data used in the population comparison analysis.

| Meta-population           | Abbreviation | Description                                                 | N   |
|---------------------------|--------------|-------------------------------------------------------------|-----|
| <b>Sub-Saharan Africa</b> | GWD          | Gambians, Western Division, The Gambia <sup>†</sup>         | 113 |
|                           | MSL          | Mende, Sierra Leone <sup>†</sup>                            | 85  |
|                           | ESN          | Esan, Nigeria <sup>†</sup>                                  | 99  |
|                           | YOR          | Yoruba, Benin City, Nigeria <sup>†</sup>                    | 77  |
|                           | YRI          | Yoruba, Ibadan, Nigeria <sup>†</sup>                        | 108 |
|                           | NIG          | Nigeria (samples from 2 locations) <sup>a,b,†</sup>         | 87  |
|                           | LWK          | Luhya, Webuye, Kenya <sup>†</sup>                           | 99  |
| <b>North Africa</b>       | TUN          | Tunisia (samples from 7 locations) <sup>a,c,†</sup>         | 208 |
|                           | MOR          | Morocco RGA*                                                | 75  |
| <b>Europe</b>             | IBS          | Iberians, Spain <sup>†</sup>                                | 107 |
|                           | TSI          | Toscani, Italy <sup>†</sup>                                 | 107 |
|                           | HGR          | Hungarians <sup>†</sup>                                     | 89  |
|                           | EAM          | European Americans <sup>†</sup>                             | 89  |
|                           | GBR          | British from England and Scotland <sup>†</sup>              | 91  |
|                           | CEU          | Utah Residents (CEPH), N&W Europe ancestry <sup>†</sup>     | 99  |
|                           | IRI          | Irish <sup>†</sup>                                          | 113 |
|                           | FN1          | Finns, Finland <sup>†</sup>                                 | 99  |
|                           | DK           | Denmark RGA*                                                | 140 |
|                           | RUS          | Russia (samples from 2 locations) <sup>a,d,†</sup>          | 80  |
| <b>Middle East</b>        | DRU          | Druze, Israel <sup>†</sup>                                  | 102 |
|                           | IRQ          | Iraq RGA*                                                   | 94  |
|                           | IRN          | Iran RGA*                                                   | 93  |
|                           | TUR          | Turkey RGA*                                                 | 88  |
| <b>South-Central Asia</b> | PJL          | Punjabi, Lahore, Pakistan <sup>†</sup>                      | 96  |
|                           | GIH          | Gujarati (India), Houston, Texas <sup>†</sup>               | 103 |
|                           | ITU          | Telugu (India), collected in United Kingdom <sup>†</sup>    | 102 |
|                           | STU          | Tamil (Sri Lanka), collected in United Kingdom <sup>†</sup> | 102 |
|                           | BEB          | Bengali, Bangladesh <sup>†</sup>                            | 86  |
| <b>East Asia</b>          | JPT          | Japanese, Tokyo, Japan <sup>†</sup>                         | 104 |
|                           | CHB          | Han Chinese in Beijing, China <sup>†</sup>                  | 103 |
|                           | HCS          | Southern Han Chinese <sup>†</sup>                           | 105 |
|                           | CDX          | Chinese Dai in Xishuangbanna, China <sup>†</sup>            | 93  |
|                           | KHV          | Kinh (Vietnamese), Ho Chi Minh City, Vietnam <sup>†</sup>   | 99  |
|                           | LAO          | Laotians <sup>†</sup>                                       | 118 |
| <b>Studied</b>            | BAL          | Baloch, Pakistan                                            | 107 |
|                           | PAS          | Pashtuns, Pakistan                                          | 103 |
|                           | PUN          | Punjabis, Pakistan                                          | 89  |

<sup>†</sup>Reference data were collected in the Kidd Lab and assembled by the Kidd Lab from other publicly available. The Kidd lab had no further involvement in data analysis.

\*RGA: Section of Forensic Genetics, Department of Forensic Medicine, Faculty of Health and Medical Sciences, University of Copenhagen.

<sup>a</sup>There were no statistically significant differences between the allele and genotype frequencies of the population samples.

<sup>b</sup>Ibo and Hausa.

<sup>c</sup>Nebeur, Kesra, Kairoun, Sousse, Mehdi, Kerkennah and Smar.

<sup>d</sup>Archangelsk and Vologda.

Table S2: Allele frequencies of 165 variants typed with the Precision ID Ancestry panel in 299 Pakistani individuals from three subpopulations (Baloch, Pashtun, and Punjabi).

| Target ID  | Minor allele frequency |                   |                  | Alleles (major : minor) |
|------------|------------------------|-------------------|------------------|-------------------------|
|            | Baloch (n = 107)       | Pashtun (n = 103) | Punjabi (n = 89) |                         |
| rs10007810 | 0.314                  | 0.347             | 0.330            | G:A                     |
| rs10108270 | 0.363                  | 0.379             | 0.444            | C:A                     |
| rs10236187 | 0.201                  | 0.063             | 0.107            | A:C                     |
| rs1040045  | 0.201                  | 0.097             | 0.129            | A:G                     |
| rs1040404  | 0.285                  | 0.248             | 0.202            | G:A                     |
| rs10496971 | 0.175                  | 0.275             | 0.247            | T:G                     |
| rs10497191 | 0.206                  | 0.117             | 0.118            | C:T                     |
| rs10511828 | 0.080                  | 0.094             | 0.045            | T:C                     |
| rs10512572 | 0.195                  | 0.098             | 0.157            | G:A                     |
| rs10513300 | 0.098                  | 0.078             | 0.118            | T:C                     |
| rs1079597  | 0.159                  | 0.184             | 0.208            | C:T                     |
| rs10839880 | 0.369                  | 0.353             | 0.360            | T:C                     |
| rs10954737 | 0.079                  | 0.102             | 0.073            | T:C                     |
| rs11227699 | 0.075                  | 0.034             | 0.051            | G:A                     |
| rs11652805 | 0.311                  | 0.291             | 0.213            | T:C                     |
| rs12130799 | 0.093                  | 0.058             | 0.034            | A:G                     |
| rs1229984  | 0.065                  | 0.098             | 0.101            | C:T                     |
| rs12439433 | 0.024                  | 0.027             | 0.006            | A:G                     |
| rs12498138 | 0.096                  | 0.041             | 0.047            | G:A                     |
| rs12544346 | 0.266                  | 0.393             | 0.393            | G:A                     |
| rs12629908 | 0.126                  | 0.142             | 0.124            | G:A                     |
| rs12657828 | 0.182                  | 0.157             | 0.124            | A:G                     |
| rs12913832 | 0.065                  | 0.165             | 0.067            | A:G                     |
| rs1296819  | 0.281                  | 0.180             | 0.182            | C:A                     |
| rs1325502  | 0.238                  | 0.238             | 0.202            | G:A                     |
| rs13400937 | 0.403                  | 0.489             | 0.448            | T:G                     |
| rs1369093  | 0.171                  | 0.102             | 0.138            | T:C                     |
| rs1407434  | 0.129                  | 0.135             | 0.182            | G:A                     |
| rs1426654  | 0.120                  | 0.068             | 0.188            | A:G                     |
| rs1462906  | 0.131                  | 0.044             | 0.090            | C:T                     |
| rs1471939  | 0.364                  | 0.447             | 0.404            | T:C                     |
| rs1500127  | 0.089                  | 0.097             | 0.079            | C:T                     |
| rs1503767  | 0.229                  | 0.177             | 0.230            | T:G                     |
| rs1513056  | 0.262                  | 0.304             | 0.348            | G:A                     |
| rs1513181  | 0.299                  | 0.330             | 0.337            | G:A                     |
| rs1569175  | 0.099                  | 0.076             | 0.101            | C:T                     |
| rs1572018  | 0.283                  | 0.237             | 0.343            | C:T                     |
| rs16891982 | 0.136                  | 0.262             | 0.176            | C:G                     |
| rs174570   | 0.118                  | 0.078             | 0.084            | C:T                     |
| rs1760921  | 0.150                  | 0.189             | 0.107            | T:C                     |
| rs17642714 | 0.159                  | 0.180             | 0.163            | A:T                     |

Table S2 (continued)

| Target ID | Minor allele frequency |                   |                  | Alleles (major : minor) |
|-----------|------------------------|-------------------|------------------|-------------------------|
|           | Baloch (n = 107)       | Pashtun (n = 103) | Punjabi (n = 89) |                         |
| rs1800414 | 0.000                  | 0.010             | 0.011            | T:C                     |
| rs1834619 | 0.151                  | 0.225             | 0.253            | G:A                     |
| rs1837606 | 0.430                  | 0.398             | 0.410            | T:C                     |
| rs1871428 | 0.477                  | 0.413             | 0.461            | G:A                     |
| rs1871534 | 0.075                  | 0.000             | 0.000            | G:C                     |
| rs1876482 | 0.131                  | 0.146             | 0.146            | G:A                     |
| rs1879488 | 0.104                  | 0.102             | 0.107            | C:A                     |
| rs192655  | 0.175                  | 0.253             | 0.267            | A:G                     |
| rs1950993 | 0.467                  | 0.383             | 0.348            | G:T                     |
| rs2001907 | 0.051                  | 0.092             | 0.045            | C:T                     |
| rs200354  | 0.210                  | 0.209             | 0.320            | G:T                     |
| rs2024566 | 0.285                  | 0.413             | 0.410            | A:G                     |
| rs2030763 | 0.215                  | 0.286             | 0.298            | G:A                     |
| rs2033111 | 0.112                  | 0.141             | 0.163            | A:G                     |
| rs2042762 | 0.023                  | 0.039             | 0.034            | T:C                     |
| rs2070586 | 0.201                  | 0.160             | 0.236            | G:A                     |
| rs2073821 | 0.121                  | 0.199             | 0.169            | C:T                     |
| rs2125345 | 0.411                  | 0.427             | 0.388            | T:C                     |
| rs214678  | 0.070                  | 0.068             | 0.056            | T:C                     |
| rs2166624 | 0.364                  | 0.340             | 0.354            | G:A                     |
| rs2196051 | 0.290                  | 0.347             | 0.381            | G:A                     |
| rs2238151 | 0.311                  | 0.471             | 0.343            | C:T                     |
| rs2306040 | 0.096                  | 0.082             | 0.101            | T:C                     |
| rs2330442 | 0.411                  | 0.427             | 0.348            | A:G                     |
| rs2357442 | 0.262                  | 0.238             | 0.331            | A:C                     |
| rs2416791 | 0.159                  | 0.121             | 0.174            | G:A                     |
| rs2504853 | 0.467                  | 0.409             | 0.379            | T:C                     |
| rs2532060 | 0.439                  | 0.413             | 0.427            | C:T                     |
| rs2593595 | 0.355                  | 0.233             | 0.303            | A:G                     |
| rs260690  | 0.170                  | 0.093             | 0.101            | A:C                     |
| rs2627037 | 0.193                  | 0.209             | 0.185            | G:A                     |
| rs2702414 | 0.117                  | 0.083             | 0.180            | G:A                     |
| rs2814778 | 0.215                  | 0.000             | 0.000            | T:C                     |
| rs2835370 | 0.131                  | 0.165             | 0.118            | T:C                     |
| rs2899826 | 0.234                  | 0.243             | 0.292            | A:G                     |
| rs2946788 | 0.387                  | 0.282             | 0.287            | T:G                     |
| rs2966849 | 0.140                  | 0.180             | 0.208            | G:A                     |
| rs2986742 | 0.290                  | 0.165             | 0.208            | T:C                     |
| rs310644  | 0.178                  | 0.140             | 0.296            | T:C                     |
| rs3118378 | 0.234                  | 0.257             | 0.348            | A:G                     |
| rs316598  | 0.421                  | 0.403             | 0.489            | T:C                     |
| rs316873  | 0.131                  | 0.180             | 0.225            | C:T                     |

Table S2 (continued)

| Target ID | Minor allele frequency |                   |                  | Alleles (major : minor) |
|-----------|------------------------|-------------------|------------------|-------------------------|
|           | Baloch (n = 107)       | Pashtun (n = 103) | Punjabi (n = 89) |                         |
| rs32314   | 0.325                  | 0.377             | 0.393            | T:C                     |
| rs37369   | 0.178                  | 0.206             | 0.236            | C:T                     |
| rs3737576 | 0.028                  | 0.034             | 0.034            | T:C                     |
| rs3745099 | 0.280                  | 0.320             | 0.236            | A:G                     |
| rs3784230 | 0.217                  | 0.272             | 0.281            | A:G                     |
| rs3793451 | 0.047                  | 0.083             | 0.079            | C:T                     |
| rs3793791 | 0.089                  | 0.112             | 0.157            | T:C                     |
| rs3811801 | 0.000                  | 0.000             | 0.000            | G:G                     |
| rs3814134 | 0.093                  | 0.034             | 0.101            | A:G                     |
| rs3823159 | 0.042                  | 0.070             | 0.090            | A:G                     |
| rs3827760 | 0.005                  | 0.015             | 0.006            | A:G                     |
| rs385194  | 0.495                  | 0.461             | 0.399            | A:G                     |
| rs3907047 | 0.098                  | 0.112             | 0.163            | T:C                     |
| rs3916235 | 0.100                  | 0.104             | 0.087            | C:T                     |
| rs3943253 | 0.127                  | 0.117             | 0.073            | A:G                     |
| rs4411548 | 0.065                  | 0.248             | 0.169            | C:T                     |
| rs4458655 | 0.198                  | 0.097             | 0.185            | T:C                     |
| rs4463276 | 0.383                  | 0.417             | 0.449            | G:A                     |
| rs4471745 | 0.042                  | 0.059             | 0.073            | G:A                     |
| rs459920  | 0.288                  | 0.422             | 0.287            | T:C                     |
| rs4666200 | 0.266                  | 0.248             | 0.264            | A:G                     |
| rs4670767 | 0.106                  | 0.191             | 0.258            | G:T                     |
| rs4717865 | 0.215                  | 0.189             | 0.270            | G:A                     |
| rs4746136 | 0.236                  | 0.218             | 0.236            | G:A                     |
| rs4781011 | 0.327                  | 0.267             | 0.360            | G:T                     |
| rs4798812 | 0.383                  | 0.291             | 0.386            | G:A                     |
| rs4821004 | 0.416                  | 0.456             | 0.371            | C:T                     |
| rs4833103 | 0.019                  | 0.042             | 0.039            | C:A                     |
| rs4880436 | 0.005                  | 0.015             | 0.011            | C:T                     |
| rs4891825 | 0.154                  | 0.146             | 0.124            | A:G                     |
| rs4908343 | 0.346                  | 0.296             | 0.382            | A:G                     |
| rs4918664 | 0.168                  | 0.214             | 0.360            | A:G                     |
| rs4918842 | 0.182                  | 0.097             | 0.112            | T:C                     |
| rs4951629 | 0.037                  | 0.039             | 0.034            | T:C                     |
| rs4955316 | 0.140                  | 0.121             | 0.157            | T:G                     |
| rs4984913 | 0.360                  | 0.495             | 0.494            | A:G                     |
| rs5768007 | 0.285                  | 0.257             | 0.348            | C:T                     |
| rs6104567 | 0.192                  | 0.330             | 0.437            | T:G                     |
| rs6422347 | 0.224                  | 0.126             | 0.219            | T:C                     |
| rs6451722 | 0.297                  | 0.321             | 0.202            | G:A                     |
| rs6464211 | 0.220                  | 0.243             | 0.264            | C:T                     |
| rs647325  | 0.164                  | 0.189             | 0.174            | A:G                     |

Table S2 (continued)

| Target ID | Minor allele frequency |                   |                  | Alleles (major : minor) |
|-----------|------------------------|-------------------|------------------|-------------------------|
|           | Baloch (n = 107)       | Pashtun (n = 103) | Punjabi (n = 89) |                         |
| rs6541030 | 0.121                  | 0.117             | 0.056            | G:A                     |
| rs6548616 | 0.443                  | 0.255             | 0.253            | T:C                     |
| rs6556352 | 0.389                  | 0.341             | 0.356            | C:T                     |
| rs671     | 0.000                  | 0.000             | 0.000            | G:G                     |
| rs6754311 | 0.290                  | 0.252             | 0.275            | C:T                     |
| rs6990312 | 0.346                  | 0.277             | 0.331            | G:T                     |
| rs705308  | 0.374                  | 0.257             | 0.258            | A:C                     |
| rs7226659 | 0.056                  | 0.092             | 0.073            | G:T                     |
| rs7238445 | 0.329                  | 0.282             | 0.315            | G:A                     |
| rs7251928 | 0.206                  | 0.180             | 0.219            | A:C                     |
| rs731257  | 0.098                  | 0.165             | 0.180            | G:A                     |
| rs7326934 | 0.112                  | 0.034             | 0.017            | G:C                     |
| rs734873  | 0.114                  | 0.206             | 0.180            | G:A                     |
| rs735480  | 0.178                  | 0.150             | 0.219            | T:C                     |
| rs7421394 | 0.430                  | 0.311             | 0.326            | A:G                     |
| rs7554936 | 0.364                  | 0.257             | 0.191            | T:C                     |
| rs7657799 | 0.084                  | 0.024             | 0.045            | T:G                     |
| rs7722456 | 0.243                  | 0.117             | 0.129            | T:C                     |
| rs772262  | 0.229                  | 0.126             | 0.163            | G:A                     |
| rs7745461 | 0.292                  | 0.214             | 0.264            | G:A                     |
| rs7803075 | 0.425                  | 0.427             | 0.489            | A:G                     |
| rs7844723 | 0.332                  | 0.382             | 0.354            | C:T                     |
| rs798443  | 0.299                  | 0.233             | 0.258            | A:G                     |
| rs7997709 | 0.139                  | 0.138             | 0.153            | T:C                     |
| rs8021730 | 0.285                  | 0.189             | 0.292            | G:T                     |
| rs8035124 | 0.393                  | 0.377             | 0.399            | A:C                     |
| rs8113143 | 0.453                  | 0.490             | 0.393            | A:C                     |
| rs818386  | 0.075                  | 0.103             | 0.129            | C:T                     |
| rs870347  | 0.103                  | 0.131             | 0.135            | A:C                     |
| rs874299  | 0.500                  | 0.461             | 0.494            | C:T                     |
| rs881728  | 0.201                  | 0.160             | 0.135            | C:A                     |
| rs917115  | 0.294                  | 0.335             | 0.410            | T:C                     |
| rs9291090 | 0.079                  | 0.131             | 0.107            | A:C                     |
| rs9319336 | 0.121                  | 0.160             | 0.163            | T:C                     |
| rs946918  | 0.164                  | 0.107             | 0.219            | G:T                     |
| rs948028  | 0.304                  | 0.155             | 0.185            | A:C                     |
| rs9522149 | 0.374                  | 0.408             | 0.292            | T:C                     |
| rs9530435 | 0.201                  | 0.136             | 0.124            | C:T                     |
| rs9809104 | 0.285                  | 0.170             | 0.174            | T:C                     |
| rs9845457 | 0.463                  | 0.408             | 0.399            | A:G                     |

<sup>1</sup> Variants marked in red were not considered in the estimation of the proportions of ancestry.

Table S3: Pairwise  $F_{ST}$ -values among the three Pakistani subpopulations Baloch, Pashtun, and Punjabi based on the allele frequencies of 165 AIMs typed with the Precision ID Ancestry panel.

| Populations | Baloch | Pashtun | Punjabi |
|-------------|--------|---------|---------|
| Baloch      | -      | *       | *       |
| Pashtun     | 0.0107 | -       | *       |
| Punjabi     | 0.0117 | 0.0048  | -       |

\* The corresponding  $p$ -values were all below  $p < 10^{-5}$  after Bonferroni correction.



Table S4: Allele frequencies of 163 variants typed with the Human Pigmentation (HuPi) AmpliSeq™ Custom panel in 299 Pakistani individuals from three subpopulations (Baloch, Pashtun, and Punjabi).

| Target ID <sup>1</sup> | Minor allele frequency | Alleles (major : minor) |
|------------------------|------------------------|-------------------------|
| <b>rs12203592</b>      | 0.008                  | C:T                     |
| <b>rs4959270</b>       | 0.301                  | C:A                     |
| <b>rs401681</b>        | 0.242                  | C:T                     |
| <b>rs10424065</b>      | 0.005                  | C:T                     |
| <b>rs6510760</b>       | 0.189                  | G:A                     |
| <b>rs1042522</b>       | 0.500                  | C:G                     |
| <b>rs80293268</b>      | <b>0.000</b>           | <b>G:C</b>              |
| <b>rs10809819</b>      | 0.058                  | A:T                     |
| rs10960748             | 0.277                  | A:C                     |
| rs75001364             | 0.017                  | A:G                     |
| <b>rs1408799</b>       | 0.329                  | T:C                     |
| <b>rs62538946</b>      | 0.135                  | A:G                     |
| rs112446852            | 0.018                  | A:G                     |
| rs79589462             | 0.131                  | A:T                     |
| rs10960751             | 0.273                  | T:C                     |
| rs10960752             | 0.273                  | G:A                     |
| rs74874037             | 0.017                  | T:C                     |
| <b>rs16929345</b>      | 0.070                  | G:C                     |
| <b>rs62538950</b>      | 0.103                  | A:T                     |
| rs13296454             | 0.273                  | G:A                     |
| <b>rs202148591</b>     | 0.017                  | AGGAG:AG                |
| rs77448128             | 0.017                  | G:C                     |
| rs75611179             | 0.017                  | G:T                     |
| <b>rs144403042</b>     | 0.408                  | AC:-                    |
| <b>rs62538954</b>      | 0.089                  | G:C                     |
| rs62538956             | 0.090                  | T:C                     |
| rs10491745             | 0.287                  | C:T                     |
| <b>rs10756391</b>      | 0.289                  | C:T                     |
| rs77494858             | 0.017                  | C:A                     |
| <b>rs79586719</b>      | 0.017                  | G:A                     |
| rs62538957             | 0.085                  | G:A                     |
| rs78774349             | 0.017                  | C:T                     |
| rs80287758             | 0.015                  | G:A                     |
| rs111589749            | 0.017                  | T:C                     |
| rs76969096             | 0.018                  | C:G                     |
| rs112201749            | 0.017                  | C:T                     |

Table S4 (continued)

| Target ID <sup>1</sup> | Minor allele frequency | Alleles (major : minor)                                         |
|------------------------|------------------------|-----------------------------------------------------------------|
| rs77445059             | 0.014                  | C:A                                                             |
| rs117687305            | 0.018                  | T:C                                                             |
| rs74889423             | 0.017                  | G:A                                                             |
| rs11791497             | 0.017                  | A:C                                                             |
| rs11787674             | 0.017                  | G:A                                                             |
| rs11791954             | 0.017                  | A:T                                                             |
| <b>rs112923802</b>     | <b>0.000</b>           | <b>TCTCTCTCTCTCTCTCTCTC:TC</b><br><b>TCTCTCTCTCTCTCTCTCTCTC</b> |
| rs76988967             | 0.017                  | C:A                                                             |
| rs62638049             | 0.017                  | A:T                                                             |
| rs61758391             | 0.017                  | G:A                                                             |
| <b>rs11787999</b>      | 0.017                  | C:T                                                             |
| rs34509359             | 0.017                  | C:A                                                             |
| <b>rs141808617</b>     | 0.017                  | AA:A                                                            |
| rs74606098             | 0.017                  | C:T                                                             |
| rs77446525             | 0.018                  | A:T                                                             |
| <b>rs139301549</b>     | 0.032                  | TTTTTT:TTTTT                                                    |
| rs35866166             | 0.017                  | T:C                                                             |
| rs112342609            | 0.018                  | G:T                                                             |
| rs77990455             | 0.017                  | T:A                                                             |
| <b>rs149076115</b>     | 0.017                  | AAGAGA:-                                                        |
| rs79662637             | 0.017                  | G:A                                                             |
| <b>rs59308154</b>      | <b>0.000</b>           | <b>TTTTTTTTT:TTTTTTTTT</b>                                      |
| rs17280279             | 0.018                  | G:A                                                             |
| <b>rs2733832</b>       | 0.252                  | C:T                                                             |
| rs2209278              | 0.018                  | C:T                                                             |
| rs683                  | 0.283                  | C:A                                                             |
| <b>rs113819841</b>     | 0.017                  | AAAAA:AAAA                                                      |
| <b>rs10756819</b>      | 0.386                  | A:G                                                             |
| <b>rs12350739</b>      | 0.204                  | G:A                                                             |
| <b>rs6475555</b>       | 0.313                  | A:G                                                             |
| <b>rs199355</b>        | 0.350                  | G:A                                                             |
| <b>rs1545397</b>       | 0.089                  | A:T                                                             |
| <b>rs1800414</b>       | 0.007                  | T:C                                                             |
| <b>rs74653330</b>      | 0.002                  | C:T                                                             |
| <b>rs121918166</b>     | <b>0.000</b>           | <b>C:T</b>                                                      |
| <b>rs1800407</b>       | 0.050                  | C:T                                                             |
| <b>rs12441727</b>      | 0.195                  | G:A                                                             |
| <b>rs1448484</b>       | 0.072                  | A:G                                                             |
| <b>rs1470608</b>       | 0.386                  | G:T                                                             |
| <b>rs4778241</b>       | <b>0.338</b>           | <b>A:C</b>                                                      |

Table S4 (continued)

| Target ID <sup>1</sup> | Minor allele frequency | Alleles (major : minor) |
|------------------------|------------------------|-------------------------|
| <b>rs7495174</b>       | 0.286                  | A:G                     |
| rs1129038              | 0.100                  | C:T                     |
| <b>rs12913832</b>      | 0.100                  | A:G                     |
| <b>rs2238289</b>       | 0.480                  | G:A                     |
| <b>rs6497292</b>       | 0.306                  | A:G                     |
| <b>rs1667394</b>       | 0.294                  | C:T                     |
| <b>rs111458470</b>     | 0.379                  | -.CAG                   |
| <b>rs4424881</b>       | 0.258                  | C:T                     |
| <b>rs16891982</b>      | 0.191                  | C:G                     |
| <b>rs28777</b>         | 0.326                  | C:A                     |
| <b>rs26722</b>         | 0.237                  | C:T                     |
| <b>rs13289</b>         | 0.335                  | C:G                     |
| <b>rs6059655</b>       | 0.018                  | G:A                     |
| <b>rs4911414</b>       | 0.144                  | G:T                     |
| <b>rs1015362</b>       | 0.176                  | C:T                     |
| <b>rs6119471</b>       | 0.018                  | C:G                     |
| <b>rs2424984</b>       | 0.197                  | T:C                     |
| rs6058017              | 0.199                  | A:G                     |
| <b>rs2378249</b>       | 0.276                  | A:G                     |
| <b>rs4911442</b>       | 0.055                  | A:G                     |
| <b>rs2284063</b>       | 0.450                  | A:G                     |
| <b>rs4821767</b>       | 0.376                  | C:A                     |
| <b>rs117612447</b>     | 0.005                  | C:T                     |
| <b>rs1544410</b>       | 0.467                  | C:T                     |
| <b>rs2228570</b>       | 0.259                  | G:A                     |
| <b>rs1426654</b>       | 0.118                  | A:G                     |
| rs2470102              | 0.115                  | A:G                     |
| <b>rs11614913</b>      | 0.356                  | C:T                     |
| <b>rs73132911</b>      | 0.034                  | T:C                     |
| <b>rs3733542</b>       | 0.113                  | G:C                     |
| <b>rs12668421</b>      | 0.299                  | A:T                     |
| <b>rs11238349</b>      | 0.294                  | G:A                     |
| <b>rs3829241</b>       | 0.149                  | G:A                     |
| <b>rs36118030</b>      | <b>0.000</b>           | <b>G:A</b>              |
| <b>rs2276288</b>       | 0.406                  | A:T                     |
| <b>rs1279403</b>       | 0.428                  | C:T                     |
| <b>rs10831496</b>      | 0.421                  | G:A                     |
| <b>rs12821256</b>      | 0.013                  | T:C                     |
| <b>rs1042602</b>       | 0.149                  | C:A                     |
| <b>rs1393350</b>       | 0.108                  | G:A                     |

Table S4 (continued)

| Target ID <sup>1</sup> | Minor allele frequency | Alleles (major : minor) |
|------------------------|------------------------|-------------------------|
| rs1126809              | 0.100                  | G:A                     |
| rs3114908              | 0.286                  | C:T                     |
| rs258322               | 0.070                  | G:A                     |
| rs3212355              | 0.000                  | C:T                     |
| rs312262906            | 0.000                  | A:AA                    |
| rs1805005              | 0.020                  | G:T                     |
| rs1805006              | 0.000                  | C:A                     |
| rs2228479              | 0.033                  | G:A                     |
| rs11547464             | 0.000                  | G:A                     |
| rs1805007              | 0.007                  | C:T                     |
| rs201326893            | 0.000                  | C:A                     |
| rs1110400              | 0.000                  | T:C                     |
| rs1805008              | 0.012                  | C:T                     |
| rs885479               | 0.042                  | G:A                     |
| rs1805009              | 0.000                  | G:C                     |
| rs8051733              | 0.237                  | A:G                     |
| rs8059973              | 0.176                  | G:A                     |
| rs12896399             | 0.308                  | G:T                     |
| rs2402130              | 0.186                  | A:G                     |
| rs34755843             | 0.003                  | CGACTCTCGA:CGA          |
| rs4904887              | 0.462                  | G:C                     |
| rs12590749             | 0.448                  | A:C                     |
| rs4904891              | 0.216                  | G:C                     |
| rs4904897              | 0.154                  | C:T                     |
| rs17128288             | 0.196                  | A:G                     |
| rs17128291             | 0.054                  | A:G                     |
| rs7152962              | 0.360                  | G:A                     |
| rs59977926             | 0.291                  | T:C                     |
| rs35617057             | 0.468                  | G:T                     |
| rs12894869             | 0.466                  | C:G                     |
| rs12895667             | 0.477                  | A:G                     |
| rs7142428              | 0.463                  | C:T                     |
| rs4410008              | 0.473                  | C:T                     |
| rs7143110              | 0.473                  | C:G                     |
| rs7144261              | 0.473                  | A:T                     |
| rs7144273              | 0.492                  | T:C                     |
| rs12894551             | 0.306                  | C:T                     |
| rs78863223             | 0.219                  | A:G                     |
| rs10131374             | 0.202                  | G:A                     |
| rs17128324             | 0.196                  | C:T                     |

Table S4 (continued)

| Target ID <sup>1</sup> | Minor allele frequency | Alleles (major : minor) |
|------------------------|------------------------|-------------------------|
| <b>rs12880508</b>      | 0.253                  | T:C                     |
| <b>rs4904927</b>       | 0.149                  | G:A                     |
| <b>rs11160071</b>      | 0.190                  | C:T                     |
| <b>rs2031526</b>       | 0.303                  | G:A                     |
| <b>rs2369633</b>       | 0.043                  | C:T                     |
| <b>rs12623857</b>      | 0.054                  | G:A                     |
| <b>rs6742078</b>       | 0.371                  | G:T                     |

<sup>1</sup>Independent variants are marked in bold. Variants not considered in the correlation analyses are marked in red.

Table S5: Estimated ancestry proportions associated with skin pigmentation on the upper arm, lower arm, or forehead in 299 Pakistani individuals from three subpopulations (Baloch, Pashtun, and Punjabi).

|                                    | Upper arm               |                    | Lower arm               |                    | Forehead                |                    |
|------------------------------------|-------------------------|--------------------|-------------------------|--------------------|-------------------------|--------------------|
|                                    | Adjusted R <sup>2</sup> | Sign. <sup>1</sup> | Adjusted R <sup>2</sup> | Sign. <sup>1</sup> | Adjusted R <sup>2</sup> | Sign. <sup>1</sup> |
| Europe                             | 0.04                    | *                  | 0.09                    | **                 | 0.04                    | *                  |
| South-Central Asia                 | < 0.01                  | -                  | 0.02                    | -                  | < 0.01                  | -                  |
| Sub-Saharan Africa                 | 0.06                    | *                  | 0.03                    | -                  | 0.07                    | **                 |
| East Asia                          | < 0.01                  | -                  | < 0.01                  | -                  | < 0.01                  | -                  |
| Full ancestry profile <sup>2</sup> | 0.10                    | **                 | 0.13                    | ***                | 0.12                    | ***                |
| Europe + Sub-Saharan Africa        | 0.10                    | **                 | 0.13                    | ***                | 0.12                    | ***                |

<sup>1</sup>Statistical significance (Sign.) after Bonferroni correction: \*\*\*  $p < 10^{-6}$ , \*\*  $p < 10^{-3}$ , \*  $p < 0.05$ .

<sup>2</sup>Proportions of European, South-Central Asian, Sub-Saharan African, and East Asian ancestry.
